# Supplementary material for: sp2-to-sp3 transitions in graphite during cold-compression
Source: Royal Society of Chemistry journal article supplement (doi:10.1039/d2cp00178k), 2022-01-01
Supplement: d2cp00178k1.pdf [file d2cp00178k1.pdf]

*Supporting Information for*

# $sp^2$ -to- $sp^3$ Transition in Graphite During Cold-compression

*Xiaohong Yuan<sup>a</sup>, Yong Cheng<sup>b</sup>, Hu Tang<sup>a,c</sup>, Pei Wang<sup>a</sup>, Fuyang Liu<sup>d</sup>, Songbai Han<sup>a,\*</sup>,  
Jinlong Zhu<sup>e</sup>, Ming-Sheng Wang<sup>b</sup>, Liping Wang<sup>a,\*\*</sup>*

<sup>a</sup>Academy for Advanced Interdisciplinary Studies & Shenzhen Engineering Research Center for Frontier Materials Synthesis at High Pressures, Southern University of Science and Technology (SUSTech), Shenzhen 518055, China

<sup>b</sup>State Key Laboratory of Physical Chemistry of Solid Surfaces, College of Materials, Xiamen University, Xiamen, Fujian 361005, China

<sup>c</sup>Bayerisches Geoinstitut, Universität Bayreuth, Bayreuth 95440, Germany

<sup>d</sup>Center for High Pressure Science and Technology Advanced Research, Beijing 100094, China

<sup>e</sup>Department of Physics, Southern University of Science and Technology (SUSTech), Shenzhen 518055, China

\* Corresponding author.

\*\*Corresponding author.

E-mail: hansb@sustech.edu.cn (S. Han), wanglp3@sustech.edu.cn (L. Wang)

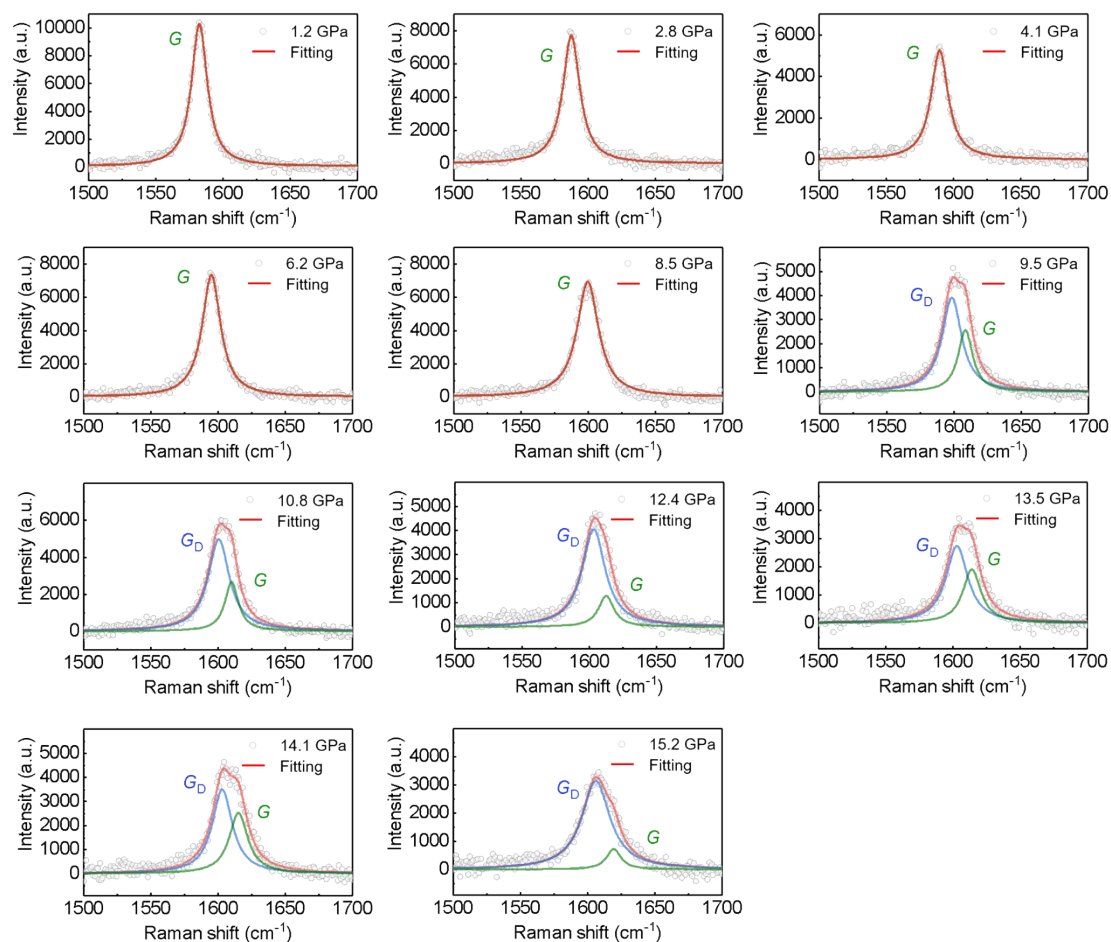

**Figure S1.** The Raman spectrum of HOPG at different pressures from 1.2 GPa to 15.2 GPa with MEW as PTM. The solid lines are Lorentzian fit to the experimental data.
